# Supplementary material for: Safety of Lubiprostone in Pediatric Patients With Functional Constipation: A Nonrandomized, Open-Label Trial
Source: PubMed Central journal article supplement — J Pediatr Gastroenterol Nutr. 2021 Aug 13;73(5):572–8. doi: 10.1097/MPG.0000000000003280 (PMC8528133; doi:10.1097/mpg.0000000000003280), 2021-08-13
Supplement: jpga-73-572-s002.pdf [file jpga-73-572-s002.pdf]

**Supplemental Table 8.** Commonly Reported TEAEs ( $\geq 5\%$  of Patients in Either Group or  $\geq 3\%$  of Patients With a GI Disorder) Categorized by Age Group 14 to 17 Years

| <b>System Organ Class<br/>(Preferred Term,<br/>MedDRA 19.1)</b> | <b>Lubiprostone<br/>12 mcg BID<br/>(n=1),<br/>n (%)</b> | <b>Lubiprostone<br/>24 mcg BID<br/>(n=14),<br/>n (%)</b> | <b>Total<br/>(N=15),<br/>N (%)</b> |
|-----------------------------------------------------------------|---------------------------------------------------------|----------------------------------------------------------|------------------------------------|
| <b>Patients with <math>\geq 1</math> TEAE</b>                   | 1 (100.0)                                               | 7 (50.0)                                                 | 8 (53.3)                           |
| <b>Gastrointestinal disorders</b>                               | 0 (0.0)                                                 | 4 (28.6)                                                 | 4 (26.7)                           |
| Abdominal pain upper                                            | 0 (0.0)                                                 | 2 (14.3)                                                 | 2 (13.3)                           |
| Diarrhea                                                        | 0 (0.0)                                                 | 2 (14.3)                                                 | 2 (13.3)                           |
| Colitis ulcerative                                              | 0 (0.0)                                                 | 1 (7.1)                                                  | 1 (6.7)                            |
| <b>Infections and infestations</b>                              | 0 (0.0)                                                 | 1 (7.1)                                                  | 1 (6.7)                            |
| Viral upper respiratory tract infection                         | 0 (0.0)                                                 | 1 (7.1)                                                  | 1 (6.7)                            |
| <b>Injury, poisoning, and procedural complications</b>          | 0 (0.0)                                                 | 1 (7.1)                                                  | 1 (6.7)                            |
| Thermal burn                                                    | 0 (0.0)                                                 | 1 (7.1)                                                  | 1 (6.7)                            |
| <b>Investigations</b>                                           | 1 (100.0)                                               | 4 (28.6)                                                 | 5 (33.3)                           |
| Blood triglycerides increased                                   | 1 (100.0)                                               | 1 (7.1)                                                  | 2 (13.3)                           |
| Blood cholesterol increased                                     | 0 (0.0)                                                 | 1 (7.1)                                                  | 1 (6.7)                            |
| Blood iron decreased                                            | 0 (0.0)                                                 | 1 (7.1)                                                  | 1 (6.7)                            |
| Blood phosphorus increased                                      | 0 (0.0)                                                 | 1 (7.1)                                                  | 1 (6.7)                            |
| Heart rate irregular                                            | 0 (0.0)                                                 | 1 (7.1)                                                  | 1 (6.7)                            |
| Red blood cells urine positive                                  | 0 (0.0)                                                 | 1 (7.1)                                                  | 1 (6.7)                            |
| Specific gravity urine increased                                | 0 (0.0)                                                 | 1 (7.1)                                                  | 1 (6.7)                            |
| <b>Metabolism and nutrition disorders</b>                       | 0 (0.0)                                                 | 1 (7.1)                                                  | 1 (6.7)                            |
| Decreased appetite                                              | 0 (0.0)                                                 | 1 (7.1)                                                  | 1 (6.7)                            |

|                                                         |           |          |          |
|---------------------------------------------------------|-----------|----------|----------|
| Hypokalemia                                             | 0 (0.0)   | 1 (7.1)  | 1 (6.7)  |
| <b>Musculoskeletal and connective tissue disorders</b>  | 0 (0.0)   | 2 (14.3) | 2 (13.3) |
| Arthralgia                                              | 0 (0.0)   | 1 (7.1)  | 1 (6.7)  |
| Back pain                                               | 0 (0.0)   | 1 (7.1)  | 1 (6.7)  |
| Neck pain                                               | 0 (0.0)   | 1 (7.1)  | 1 (6.7)  |
| <b>Renal and urinary disorders</b>                      | 1 (100.0) | 1 (7.1)  | 2 (13.3) |
| Urine abnormality                                       | 1 (100.0) | 1 (7.1)  | 2 (13.3) |
| <b>Respiratory, thoracic, and mediastinal disorders</b> | 0 (0.0)   | 1 (7.1)  | 1 (6.7)  |
| Cough                                                   | 0 (0.0)   | 1 (7.1)  | 1 (6.7)  |

BID = twice daily; GI = gastrointestinal; MedDRA = Medical Dictionary for Regulatory Activities; N = total population; n = subgroup of total population; TEAE = treatment-emergent adverse event.
