# Supplementary material for: Safety of Lubiprostone in Pediatric Patients With Functional Constipation: A Nonrandomized, Open-Label Trial
Source: PubMed Central journal article supplement — J Pediatr Gastroenterol Nutr. 2021 Aug 13;73(5):572–8. doi: 10.1097/MPG.0000000000003280 (PMC8528133; doi:10.1097/mpg.0000000000003280), 2021-08-13
Supplement: jpga-73-572-s003.pdf [file jpga-73-572-s003.pdf]

**Supplemental Table 9.** Commonly Reported TEAEs (≥5% of Patients in Either Group) Categorized by Patient Weight Among those Receiving a 24-mcg BID Lubiprostone Dose

| <b>System Organ Class<br/>(Preferred Term, MedDRA 19.1)</b> | <b>Patient<br/>Weight ≥50<br/>to ≤60 kg<br/>(n=17),<br/>No. (%)</b> | <b>Patient<br/>Weight &gt;60<br/>to &lt;80 kg<br/>(n=8),<br/>No. (%)</b> | <b>Patient Weight<br/>≥80 kg<br/>(n=6),<br/>No. (%)</b> | <b>Total<br/>(N=31),<br/>No. (%)</b> |
|-------------------------------------------------------------|---------------------------------------------------------------------|--------------------------------------------------------------------------|---------------------------------------------------------|--------------------------------------|
| <b>Patients with ≥1 TEAE</b>                                | 9 (52.9)                                                            | 3 (37.5)                                                                 | 3 (50.0)                                                | 15 (48.4)                            |
| <b>Gastrointestinal disorders</b>                           | 6 (35.3)                                                            | 2 (25.0)                                                                 | 2 (33.3)                                                | 10 (32.3)                            |
| Diarrhea                                                    | 1 (5.9)                                                             | 0 (0.0)                                                                  | 2 (33.3)                                                | 3 (9.7)                              |
| Vomiting                                                    | 2 (11.8)                                                            | 1 (12.5)                                                                 | 0 (0.0)                                                 | 3 (9.7)                              |
| Abdominal pain                                              | 1 (5.9)                                                             | 1 (12.5)                                                                 | 0 (0.0)                                                 | 2 (6.5)                              |
| Abdominal pain upper                                        | 2 (11.8)                                                            | 0 (0.0)                                                                  | 0 (0.0)                                                 | 2 (6.5)                              |
| Anal fissure                                                | 0 (0.0)                                                             | 1 (12.5)                                                                 | 0 (0.0)                                                 | 1 (3.2)                              |
| Aphthous ulcer                                              | 1 (5.9)                                                             | 0 (0.0)                                                                  | 0 (0.0)                                                 | 1 (3.2)                              |
| Colitis ulcerative                                          | 1 (5.9)                                                             | 0 (0.0)                                                                  | 0 (0.0)                                                 | 1 (3.2)                              |
| Constipation                                                | 0 (0.0)                                                             | 1 (12.5)                                                                 | 0 (0.0)                                                 | 1 (3.2)                              |
| Fecaloma                                                    | 0 (0.0)                                                             | 1 (12.5)                                                                 | 0 (0.0)                                                 | 1 (3.2)                              |
| Gastroesophageal reflux disease                             | 0 (0.0)                                                             | 1 (12.5)                                                                 | 0 (0.0)                                                 | 1 (3.2)                              |
| Nausea                                                      | 1 (5.9)                                                             | 0 (0.0)                                                                  | 0 (0.0)                                                 | 1 (3.2)                              |
| <b>Immune system disorders</b>                              | 1 (5.9)                                                             | 0 (0.0)                                                                  | 0 (0.0)                                                 | 1 (3.2)                              |
| Anaphylactoid reaction                                      | 1 (5.9)                                                             | 0 (0.0)                                                                  | 0 (0.0)                                                 | 1 (3.2)                              |
| <b>Infections and infestations</b>                          | 3 (17.6)                                                            | 0 (0.0)                                                                  | 0 (0.0)                                                 | 3 (9.7)                              |
| Pharyngitis streptococcal                                   | 1 (5.9)                                                             | 0 (0.0)                                                                  | 0 (0.0)                                                 | 1 (3.2)                              |
| Sinusitis                                                   | 1 (5.9)                                                             | 0 (0.0)                                                                  | 0 (0.0)                                                 | 1 (3.2)                              |
| Viral upper respiratory tract infection                     | 1 (5.9)                                                             | 0 (0.0)                                                                  | 0 (0.0)                                                 | 1 (3.2)                              |
| Injury, poisoning and procedural complications              | 0 (0.0)                                                             | 0 (0.0)                                                                  | 1 (16.7)                                                | 1 (3.2)                              |
| Thermal burn                                                | 0 (0.0)                                                             | 0 (0.0)                                                                  | 1 (16.7)                                                | 1 (3.2)                              |
| <b>Investigations</b>                                       | 4 (23.5)                                                            | 3 (37.5)                                                                 | 1 (16.7)                                                | 8 (25.8)                             |
| Blood cholesterol increased                                 | 2 (11.8)                                                            | 0 (0.0)                                                                  | 0 (0.0)                                                 | 2 (6.5)                              |
| Blood iron decreased                                        | 1 (5.9)                                                             | 1 (12.5)                                                                 | 0 (0.0)                                                 | 2 (6.5)                              |

|                                                        |         |          |          |         |
|--------------------------------------------------------|---------|----------|----------|---------|
| Alanine aminotransferase increased                     | 0 (0.0) | 1 (12.5) | 0 (0.0)  | 1 (3.2) |
| Blood phosphorus increased                             | 0 (0.0) | 1 (12.5) | 0 (0.0)  | 1 (3.2) |
| Blood thyroid stimulating hormone increased            | 0 (0.0) | 1 (12.5) | 0 (0.0)  | 1 (3.2) |
| Blood triglycerides increased                          | 1 (5.9) | 0 (0.0)  | 0 (0.0)  | 1 (3.2) |
| Glycosylated hemoglobin increased                      | 0 (0.0) | 0 (0.0)  | 1 (16.7) | 1 (3.2) |
| Heart rate irregular                                   | 1 (5.9) | 0 (0.0)  | 0 (0.0)  | 1 (3.2) |
| Red blood cells urine positive                         | 1 (5.9) | 0 (0.0)  | 0 (0.0)  | 1 (3.2) |
| Specific gravity urine increased                       | 0 (0.0) | 1 (12.5) | 0 (0.0)  | 1 (3.2) |
| <b>Metabolism and nutrition disorders</b>              | 1 (5.9) | 0 (0.0)  | 1 (16.7) | 2 (6.5) |
| Decreased appetite                                     | 1 (5.9) | 0 (0.0)  | 0 (0.0)  | 1 (3.2) |
| Hypertriglyceridemia                                   | 0 (0.0) | 0 (0.0)  | 1 (16.7) | 1 (3.2) |
| Hypokalemia                                            | 1 (5.9) | 0 (0.0)  | 0 (0.0)  | 1 (3.2) |
| Impaired fasting glucose                               | 0 (0.0) | 0 (0.0)  | 1 (16.7) | 1 (3.2) |
| <b>Musculoskeletal and connective tissue disorders</b> | 1 (5.9) | 0 (0.0)  | 1 (16.7) | 2 (6.5) |
| Arthralgia                                             | 1 (5.9) | 0 (0.0)  | 0 (0.0)  | 1 (3.2) |
| Back pain                                              | 1 (5.9) | 0 (0.0)  | 0 (0.0)  | 1 (3.2) |
| Neck pain                                              | 0 (0.0) | 0 (0.0)  | 1 (16.7) | 1 (3.2) |
| <b>Nervous system disorders</b>                        | 0 (0.0) | 0 (0.0)  | 1 (16.7) | 1 (3.2) |
| Headache                                               | 0 (0.0) | 0 (0.0)  | 1 (16.7) | 1 (3.2) |
| <b>Renal and urinary disorders</b>                     | 0 (0.0) | 1 (12.5) | 0 (0.0)  | 1 (3.2) |
| Urine abnormality                                      | 0 (0.0) | 1 (12.5) | 0 (0.0)  | 1 (3.2) |
| <b>Respiratory, thoracic and mediastinal disorders</b> | 1 (5.9) | 0 (0.0)  | 1 (16.7) | 2 (6.5) |
| Asthma exercise induced                                | 0 (0.0) | 0 (0.0)  | 1 (16.7) | 1 (3.2) |
| Cough                                                  | 1 (5.9) | 0 (0.0)  | 0 (0.0)  | 1 (3.2) |
| <b>Skin and subcutaneous tissue disorders</b>          | 0 (0.0) | 1 (12.5) | 0 (0.0)  | 1 (3.2) |
| Rash                                                   | 0 (0.0) | 1 (12.5) | 0 (0.0)  | 1 (3.2) |

BID = twice daily; GI = gastrointestinal; MedDRA = Medical Dictionary for Regulatory Activities; N = total population; n = subgroup of total population; TEAE = treatment-emergent adverse event.
