# Supplementary material for: Safety of Lubiprostone in Pediatric Patients With Functional Constipation: A Nonrandomized, Open-Label Trial
Source: PubMed Central journal article supplement — J Pediatr Gastroenterol Nutr. 2021 Aug 13;73(5):572–8. doi: 10.1097/MPG.0000000000003280 (PMC8528133; doi:10.1097/mpg.0000000000003280), 2021-08-13
Supplement: jpga-73-572-s006.pdf [file jpga-73-572-s006.pdf]

**Supplemental Figure 1.** Study flow and disposition of patients.

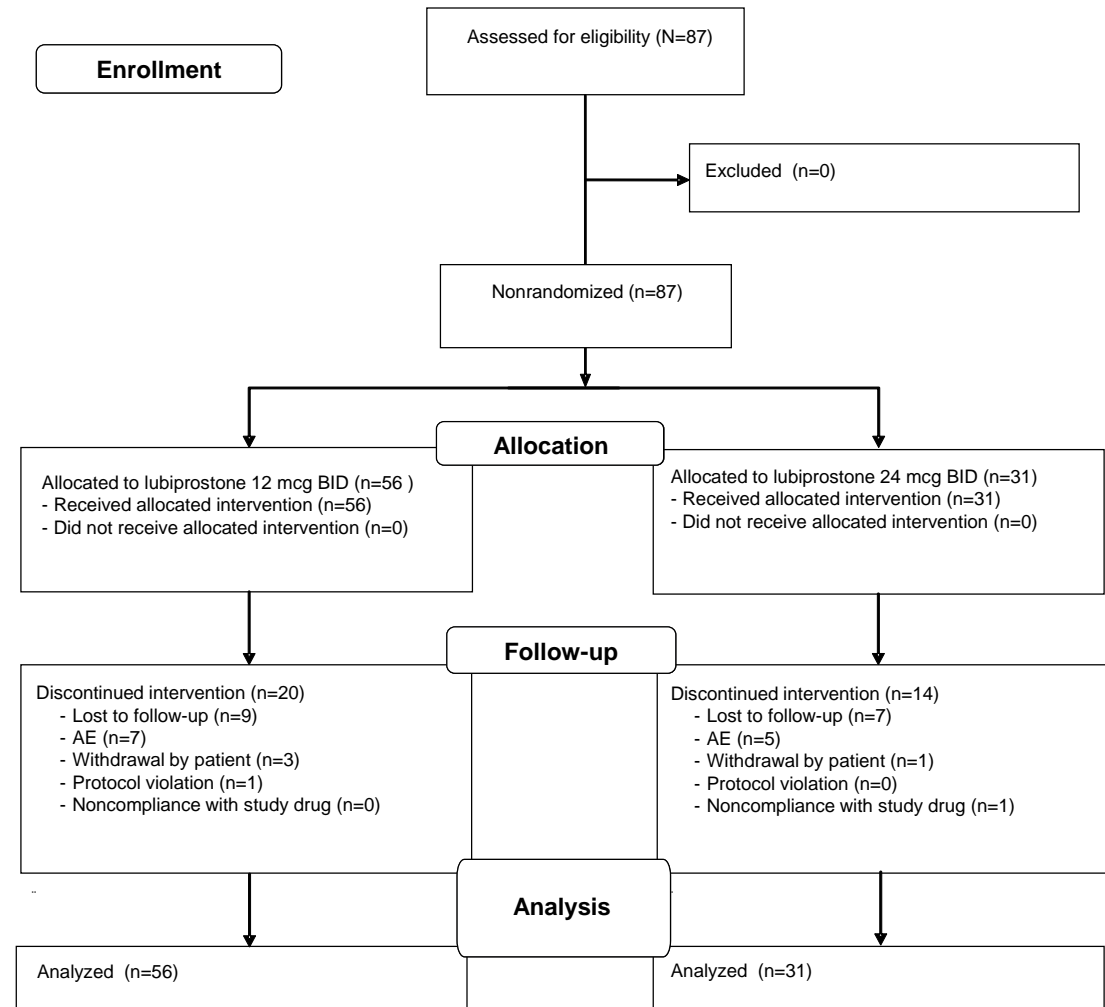

AE, adverse event; BID, twice daily; N, total population; n, subgroup of population.
