# Supplementary material for: Safety of Lubiprostone in Pediatric Patients With Functional Constipation: A Nonrandomized, Open-Label Trial
Source: PubMed Central journal article supplement — J Pediatr Gastroenterol Nutr. 2021 Aug 13;73(5):572–8. doi: 10.1097/MPG.0000000000003280 (PMC8528133; doi:10.1097/mpg.0000000000003280), 2021-08-13
Supplement: jpga-73-572-s007.pdf [file jpga-73-572-s007.pdf]

**Supplemental Table 1.** Commonly Reported TEAEs ( $\geq 5\%$  of Patients in Either Group or  $\geq 3\%$  of Patients With a GI Disorder) Categorized by Male Sex

| <b>System Organ Class<br/>(Preferred Term, MedDRA<br/>19.1)</b> | <b>Lubiprostone<br/>12 mcg BID (n=24),<br/>n (%)</b> | <b>Lubiprostone<br/>24 mcg BID (n=14),<br/>n (%)</b> | <b>Total<br/>(N=38),<br/>N (%)</b> |
|-----------------------------------------------------------------|------------------------------------------------------|------------------------------------------------------|------------------------------------|
| <b>Patients with <math>\geq 1</math> TEAE</b>                   | 11 (45.8)                                            | 5 (35.7)                                             | 16 (42.1)                          |
| <b>Gastrointestinal disorders</b>                               | 5 (20.8)                                             | 3 (21.4)                                             | 8 (21.1)                           |
| Diarrhea                                                        | 2 (8.3)                                              | 1 (7.1)                                              | 3 (7.9)                            |
| Abdominal pain upper                                            | 1 (4.2)                                              | 1 (7.1)                                              | 2 (5.3)                            |
| Dyspepsia                                                       | 2 (8.3)                                              | 0 (0.0)                                              | 2 (5.3)                            |
| Vomiting                                                        | 1 (4.2)                                              | 1 (7.1)                                              | 2 (5.3)                            |
| Abdominal distension                                            | 1 (4.2)                                              | 0 (0.0)                                              | 1 (2.6)                            |
| Abdominal pain                                                  | 1 (4.2)                                              | 0 (0.0)                                              | 1 (2.6)                            |
| Abdominal tenderness                                            | 1 (4.2)                                              | 0 (0.0)                                              | 1 (2.6)                            |
| Fecaloma                                                        | 1 (4.2)                                              | 0 (0.0)                                              | 1 (2.6)                            |
| Flatulence                                                      | 1 (4.2)                                              | 0 (0.0)                                              | 1 (2.6)                            |
| Nausea                                                          | 0 (0.0)                                              | 1 (7.1)                                              | 1 (2.6)                            |
| <b>Injury, poisoning, and<br/>procedural complications</b>      | 2 (8.3)                                              | 1 (7.1)                                              | 3 (7.9)                            |
| Thermal burn                                                    | 0 (0.0)                                              | 1 (7.1)                                              | 1 (2.6)                            |
| <b>Investigations</b>                                           | 2 (8.3)                                              | 2 (14.3)                                             | 4 (10.5)                           |
| Blood uric acid decreased                                       | 2 (8.3)                                              | 0 (0.0)                                              | 2 (5.3)                            |
| Blood iron decreased                                            | 0 (0.0)                                              | 1 (7.1)                                              | 1 (2.6)                            |
| Blood phosphorus increased                                      | 0 (0.0)                                              | 1 (7.1)                                              | 1 (2.6)                            |
| Heart rate irregular                                            | 0 (0.0)                                              | 1 (7.1)                                              | 1 (2.6)                            |
| Specific gravity urine<br>increased                             | 0 (0.0)                                              | 1 (7.1)                                              | 1 (2.6)                            |
| <b>Musculoskeletal and<br/>connective tissue disorders</b>      | 1 (4.2)                                              | 1 (7.1)                                              | 2 (5.3)                            |
| Neck pain                                                       | 0 (0.0)                                              | 1 (7.1)                                              | 1 (2.6)                            |
| <b>Renal and urinary disorders</b>                              | 0 (0.0)                                              | 1 (7.1)                                              | 1 (2.6)                            |
| Urine abnormality                                               | 0 (0.0)                                              | 1 (7.1)                                              | 1 (2.6)                            |

BID = twice daily; GI = gastrointestinal; MedDRA = Medical Dictionary for Regulatory Activities; N = total population; n = subgroup of total population; TEAE = treatment-emergent adverse event.
