# Supplementary material for: Safety of Lubiprostone in Pediatric Patients With Functional Constipation: A Nonrandomized, Open-Label Trial
Source: PubMed Central journal article supplement — J Pediatr Gastroenterol Nutr. 2021 Aug 13;73(5):572–8. doi: 10.1097/MPG.0000000000003280 (PMC8528133; doi:10.1097/mpg.0000000000003280), 2021-08-13
Supplement: jpga-73-572-s008.pdf [file jpga-73-572-s008.pdf]

**Supplemental Table 2.** Commonly Reported TEAEs ( $\geq 5\%$  of Patients in Either Group or  $\geq 3\%$  of Patients With a GI Disorder) Categorized by Female Sex

| <b>System Organ Class<br/>(Preferred Term,<br/>MedDRA 19.1)</b> | <b>Lubiprostone<br/>12 mcg BID<br/>(n=32),<br/>n (%)</b> | <b>Lubiprostone<br/>24 mcg BID<br/>(n=17),<br/>n (%)</b> | <b>Total<br/>(N=49),<br/>N (%)</b> |
|-----------------------------------------------------------------|----------------------------------------------------------|----------------------------------------------------------|------------------------------------|
| <b>Patients with <math>\geq 1</math> TEAE</b>                   | 21 (65.6)                                                | 10 (58.8)                                                | 31 (63.3)                          |
| <b>Gastrointestinal disorders</b>                               | 8 (25.0)                                                 | 7 (41.2)                                                 | 15 (30.6)                          |
| Diarrhea                                                        | 3 (9.4)                                                  | 2 (11.8)                                                 | 5 (10.2)                           |
| Nausea                                                          | 4 (12.5)                                                 | 0 (0.0)                                                  | 4 (8.2)                            |
| Vomiting                                                        | 2 (6.3)                                                  | 2 (11.8)                                                 | 4 (8.2)                            |
| Abdominal pain                                                  | 0 (0.0)                                                  | 2 (11.8)                                                 | 2 (4.1)                            |
| Abdominal pain upper                                            | 0 (0.0)                                                  | 1 (5.9)                                                  | 1 (2.0)                            |
| Anal fissure                                                    | 0 (0.0)                                                  | 1 (5.9)                                                  | 1 (2.0)                            |
| Aphthous ulcer                                                  | 0 (0.0)                                                  | 1 (5.9)                                                  | 1 (2.0)                            |
| Colitis ulcerative                                              | 0 (0.0)                                                  | 1 (5.9)                                                  | 1 (2.0)                            |
| Constipation                                                    | 0 (0.0)                                                  | 1 (5.9)                                                  | 1 (2.0)                            |
| Fecaloma                                                        | 0 (0.0)                                                  | 1 (5.9)                                                  | 1 (2.0)                            |
| Gastroesophageal reflux disease                                 | 0 (0.0)                                                  | 1 (5.9)                                                  | 1 (2.0)                            |
| Oral contusion                                                  | 1 (3.1)                                                  | 0 (0.0)                                                  | 1 (2.0)                            |
| <b>General disorders and administration site conditions</b>     | 4 (12.5)                                                 | 0 (0.0)                                                  | 4 (8.2)                            |
| Pyrexia                                                         | 2 (6.3)                                                  | 0 (0.0)                                                  | 2 (4.1)                            |
| <b>Immune system disorders</b>                                  | 0 (0.0)                                                  | 1 (5.9)                                                  | 1 (2.0)                            |
| Anaphylactoid reaction                                          | 0 (0.0)                                                  | 1 (5.9)                                                  | 1 (2.0)                            |
| <b>Infections and infestations</b>                              | 6 (18.8)                                                 | 3 (17.6)                                                 | 9 (18.4)                           |
| Pharyngitis streptococcal                                       | 2 (6.3)                                                  | 1 (5.9)                                                  | 3 (6.1)                            |
| Gastroenteritis viral                                           | 2 (6.3)                                                  | 0 (0.0)                                                  | 2 (4.1)                            |
| Sinusitis                                                       | 1 (3.1)                                                  | 1 (5.9)                                                  | 2 (4.1)                            |
| Viral upper respiratory tract infection                         | 0 (0.0)                                                  | 1 (5.9)                                                  | 1 (2.0)                            |

|                                                         |          |          |           |
|---------------------------------------------------------|----------|----------|-----------|
| <b>Investigations</b>                                   | 8 (25.0) | 6 (35.3) | 14 (28.6) |
| Blood iron decreased                                    | 3 (9.4)  | 1 (5.9)  | 4 (8.2)   |
| Blood triglycerides increased                           | 2 (6.3)  | 1 (5.9)  | 3 (6.1)   |
| Blood cholesterol increased                             | 0 (0.0)  | 2 (11.8) | 2 (4.1)   |
| Blood iron increased                                    | 2 (6.3)  | 0 (0.0)  | 2 (4.1)   |
| Urine analysis abnormal                                 | 2 (6.3)  | 0 (0.0)  | 2 (4.1)   |
| Alanine aminotransferase increased                      | 0 (0.0)  | 1 (5.9)  | 1 (2.0)   |
| Blood thyroid-stimulating hormone increased             | 0 (0.0)  | 1 (5.9)  | 1 (2.0)   |
| Glycosylated hemoglobin increased                       | 0 (0.0)  | 1 (5.9)  | 1 (2.0)   |
| Red blood cells urine positive                          | 0 (0.0)  | 1 (5.9)  | 1 (2.0)   |
| <b>Metabolism and nutrition disorders</b>               | 1 (3.1)  | 2 (11.8) | 3 (6.1)   |
| Decreased appetite                                      | 1 (3.1)  | 1 (5.9)  | 2 (4.1)   |
| Hypertriglyceridemia                                    | 0 (0.0)  | 1 (5.9)  | 1 (2.0)   |
| Hypokalemia                                             | 0 (0.0)  | 1 (5.9)  | 1 (2.0)   |
| Impaired fasting glucose                                | 0 (0.0)  | 1 (5.9)  | 1 (2.0)   |
| <b>Musculoskeletal and connective tissue disorders</b>  | 0 (0.0)  | 1 (5.9)  | 1 (2.0)   |
| Arthralgia                                              | 0 (0.0)  | 1 (5.9)  | 1 (2.0)   |
| Back pain                                               | 0 (0.0)  | 1 (5.9)  | 1 (2.0)   |
| <b>Nervous system disorders</b>                         | 3 (9.4)  | 1 (5.9)  | 4 (8.2)   |
| Headache                                                | 3 (9.4)  | 1 (5.9)  | 4 (8.2)   |
| <b>Renal and urinary disorders</b>                      | 2 (6.3)  | 0 (0.0)  | 2 (4.1)   |
| Urine abnormality                                       | 2 (6.3)  | 0 (0.0)  | 2 (4.1)   |
| <b>Respiratory, thoracic, and mediastinal disorders</b> | 4 (12.5) | 2 (11.8) | 6 (12.2)  |
| Asthma exercise                                         | 0 (0.0)  | 1 (5.9)  | 1 (2.0)   |

|                                               |          |         |          |
|-----------------------------------------------|----------|---------|----------|
| induced                                       |          |         |          |
| Cough                                         | 0 (0.0)  | 1 (5.9) | 1 (2.0)  |
| <b>Skin and subcutaneous tissue disorders</b> | 4 (12.5) | 1 (5.9) | 5 (10.2) |
| Rash                                          | 0 (0.0)  | 1 (5.9) | 1 (2.0)  |

BID = twice daily; GI = gastrointestinal; MedDRA = Medical Dictionary for Regulatory Activities; N = total population; n = subgroup of total population; TEAE = treatment-emergent adverse event.
