# Supplementary material for: Safety of Lubiprostone in Pediatric Patients With Functional Constipation: A Nonrandomized, Open-Label Trial
Source: PubMed Central journal article supplement — J Pediatr Gastroenterol Nutr. 2021 Aug 13;73(5):572–8. doi: 10.1097/MPG.0000000000003280 (PMC8528133; doi:10.1097/mpg.0000000000003280), 2021-08-13
Supplement: jpga-73-572-s009.pdf [file jpga-73-572-s009.pdf]

**Supplemental Table 3.** Commonly Reported TEAEs ( $\geq 5\%$  of Patients in Either Group or  $\geq 3\%$  of Patients With a GI Disorder) Categorized by White Patients

| <b>System Organ Class (Preferred Term, MedDRA 19.1)</b> | <b>Lubiprostone 12 mcg BID (n=43), n (%)</b> | <b>Lubiprostone 24 mcg BID (n=25), n (%)</b> | <b>Total (N=68), N (%)</b> |
|---------------------------------------------------------|----------------------------------------------|----------------------------------------------|----------------------------|
| <b>Patients with <math>\geq 1</math> TEAE</b>           | 27 (62.8)                                    | 13 (52.0)                                    | 40 (58.8)                  |
| <b>Gastrointestinal disorders</b>                       | 12 (27.9)                                    | 8 (32.0)                                     | 20 (29.4)                  |
| Diarrhea                                                | 5 (11.6)                                     | 3 (12.0)                                     | 8 (11.8)                   |
| Vomiting                                                | 3 (7.0)                                      | 3 (12.0)                                     | 6 (8.8)                    |
| Nausea                                                  | 4 (9.3)                                      | 1 (4.0)                                      | 5 (7.4)                    |
| Abdominal pain upper                                    | 1 (2.3)                                      | 1 (4.0)                                      | 2 (2.9)                    |
| Dyspepsia                                               | 2 (4.7)                                      | 0 (0.0)                                      | 2 (2.9)                    |
| Abdominal pain                                          | 0 (0.0)                                      | 1 (4.0)                                      | 1 (1.5)                    |
| Aphthous ulcer                                          | 0 (0.0)                                      | 1 (4.0)                                      | 1 (1.5)                    |
| <b>Infections and infestations</b>                      | 8 (18.6)                                     | 3 (12.0)                                     | 11 (16.2)                  |
| Pharyngitis streptococcal                               | 3 (7.0)                                      | 1 (4.0)                                      | 4 (5.9)                    |
| <b>Investigations</b>                                   | 10 (23.3)                                    | 6 (24.0)                                     | 16 (23.5)                  |
| Blood iron decreased                                    | 3 (7.0)                                      | 2 (8.0)                                      | 5 (7.4)                    |
| Blood cholesterol increased                             | 0 (0.0)                                      | 2 (8.0)                                      | 2 (2.9)                    |

BID = twice daily; GI = gastrointestinal; MedDRA = Medical Dictionary for Regulatory Activities; N = total population; n = subgroup of total population; TEAE = treatment-emergent adverse event.
