# Supplementary material for: Safety of Lubiprostone in Pediatric Patients With Functional Constipation: A Nonrandomized, Open-Label Trial
Source: PubMed Central journal article supplement — J Pediatr Gastroenterol Nutr. 2021 Aug 13;73(5):572–8. doi: 10.1097/MPG.0000000000003280 (PMC8528133; doi:10.1097/mpg.0000000000003280), 2021-08-13
Supplement: jpga-73-572-s010.pdf [file jpga-73-572-s010.pdf]

**Supplemental Table 4.** Commonly Reported TEAEs (≥5% of Patients in Either Group or ≥3% of Patients With a GI Disorder) Categorized by Black Patients

| <b>System Organ Class<br/>(Preferred Term,<br/>MedDRA 19.1)</b> | <b>Lubiprostone<br/>12 mcg BID<br/>(n=11),<br/>n (%)</b> | <b>Lubiprostone<br/>24 mcg BID<br/>(n=5),<br/>n (%)</b> | <b>Total<br/>(N=16),<br/>N (%)</b> |
|-----------------------------------------------------------------|----------------------------------------------------------|---------------------------------------------------------|------------------------------------|
| <b>Patients with ≥1 TEAE</b>                                    | 4 (36.4)                                                 | 2 (40.0)                                                | 6 (37.5)                           |
| <b>Eye disorders</b>                                            | 1 (9.1)                                                  | 0 (0.0)                                                 | 1 (6.3)                            |
| Conjunctivitis allergic                                         | 1 (9.1)                                                  | 0 (0.0)                                                 | 1 (6.3)                            |
| <b>Gastrointestinal disorders</b>                               | 1 (9.1)                                                  | 2 (40.0)                                                | 3 (18.8)                           |
| Abdominal pain                                                  | 1 (9.1)                                                  | 1 (20.0)                                                | 2 (12.5)                           |
| Abdominal pain upper                                            | 0 (0.0)                                                  | 1 (20.0)                                                | 1 (6.3)                            |
| Anal fissure                                                    | 0 (0.0)                                                  | 1 (20.0)                                                | 1 (6.3)                            |
| Colitis ulcerative                                              | 0 (0.0)                                                  | 1 (20.0)                                                | 1 (6.3)                            |
| Constipation                                                    | 0 (0.0)                                                  | 1 (20.0)                                                | 1 (6.3)                            |
| Fecaloma                                                        | 0 (0.0)                                                  | 1 (20.0)                                                | 1 (6.3)                            |
| Gastroesophageal reflux disease                                 | 0 (0.0)                                                  | 1 (20.0)                                                | 1 (6.3)                            |
| <b>General disorders and administration site conditions</b>     | 1 (9.1)                                                  | 0 (0.0)                                                 | 1 (6.3)                            |
| Chest pain                                                      | 1 (9.1)                                                  | 0 (0.0)                                                 | 1 (6.3)                            |
| Pyrexia                                                         | 1 (9.1)                                                  | 0 (0.0)                                                 | 1 (6.3)                            |
| <b>Infections and infestations</b>                              | 1 (9.1)                                                  | 0 (0.0)                                                 | 1 (6.3)                            |
| Sinusitis                                                       | 1 (9.1)                                                  | 0 (0.0)                                                 | 1 (6.3)                            |
| <b>Investigations</b>                                           | 0 (0.0)                                                  | 2 (40.0)                                                | 2 (12.5)                           |
| Blood thyroid-stimulating hormone                               | 0 (0.0)                                                  | 1 (20.0)                                                | 1 (6.3)                            |

|                                                         |          |          |          |
|---------------------------------------------------------|----------|----------|----------|
| increased                                               |          |          |          |
| Red blood cells urine positive                          | 0 (0.0)  | 1 (20.0) | 1 (6.3)  |
| <b>Metabolism and nutrition disorders</b>               | 1 (9.1)  | 1 (20.0) | 2 (12.5) |
| Decreased appetite                                      | 1 (9.1)  | 1 (20.0) | 2 (12.5) |
| Hypokalemia                                             | 0 (0.0)  | 1 (20.0) | 1 (6.3)  |
| <b>Musculoskeletal and connective tissue disorders</b>  | 0 (0.0)  | 1 (20.0) | 1 (6.3)  |
| Arthralgia                                              | 0 (0.0)  | 1 (20.0) | 1 (6.3)  |
| Back pain                                               | 0 (0.0)  | 1 (20.0) | 1 (6.3)  |
| <b>Nervous system disorders</b>                         | 2 (18.2) | 0 (0.0)  | 2 (12.5) |
| Headache                                                | 2 (18.2) | 0 (0.0)  | 2 (12.5) |
| <b>Respiratory, thoracic, and mediastinal disorders</b> | 1 (9.1)  | 1 (20.0) | 2 (12.5) |
| Cough                                                   | 0 (0.0)  | 1 (20.0) | 1 (6.3)  |
| Nasal congestion                                        | 1 (9.1)  | 0 (0.0)  | 1 (6.3)  |
| <b>Skin and subcutaneous tissue disorders</b>           | 0 (0.0)  | 1 (20.0) | 1 (6.3)  |
| Rash                                                    | 0 (0.0)  | 1 (20.0) | 1 (6.3)  |

BID = twice daily; GI = gastrointestinal; MedDRA = Medical Dictionary for Regulatory Activities; N = total population; n = subgroup of total population; TEAE = treatment-emergent adverse event.
