# Supplementary material for: Safety of Lubiprostone in Pediatric Patients With Functional Constipation: A Nonrandomized, Open-Label Trial
Source: PubMed Central journal article supplement — J Pediatr Gastroenterol Nutr. 2021 Aug 13;73(5):572–8. doi: 10.1097/MPG.0000000000003280 (PMC8528133; doi:10.1097/mpg.0000000000003280), 2021-08-13
Supplement: jpga-73-572-s011.pdf [file jpga-73-572-s011.pdf]

**Supplemental Table 5.** Commonly Reported TEAEs ( $\geq 5\%$  of Patients in Either Group or  $\geq 3\%$  of Patients With a GI Disorder) Categorized by Other Race Patients

| <b>System Organ Class<br/>(Preferred Term,<br/>MedDRA 19.1)</b> | <b>Lubiprostone<br/>12 mcg BID<br/>(n=2),<br/>n (%)</b> | <b>Lubiprostone<br/>24 mcg BID<br/>(n=1),<br/>n (%)</b> | <b>Total<br/>(N=3),<br/>N (%)</b> |
|-----------------------------------------------------------------|---------------------------------------------------------|---------------------------------------------------------|-----------------------------------|
| <b>Patients with <math>\geq 1</math> TEAE</b>                   | 1 (50.0)                                                | 0 (0.0)                                                 | 1 (33.3)                          |
| <b>Skin and subcutaneous<br/>tissue disorders</b>               | 1 (50.0)                                                | 0 (0.0)                                                 | 1 (33.3)                          |
| Rash                                                            | 1 (50.0)                                                | 0 (0.0)                                                 | 1 (33.3)                          |
| Contact dermatitis                                              | 1 (50.0)                                                | 0 (0.0)                                                 | 1 (33.3)                          |

BID = twice daily; GI = gastrointestinal; MedDRA = Medical Dictionary for Regulatory Activities; N = total population; n = subgroup of total population; TEAE = treatment-emergent adverse event.
