# Supplementary material for: Safety of Lubiprostone in Pediatric Patients With Functional Constipation: A Nonrandomized, Open-Label Trial
Source: PubMed Central journal article supplement — J Pediatr Gastroenterol Nutr. 2021 Aug 13;73(5):572–8. doi: 10.1097/MPG.0000000000003280 (PMC8528133; doi:10.1097/mpg.0000000000003280), 2021-08-13
Supplement: jpga-73-572-s012.pdf [file jpga-73-572-s012.pdf]

**Supplemental Table 6.** Commonly Reported TEAEs ( $\geq 5\%$  of Patients in Either Group or  $\geq 3\%$  of Patients With a GI Disorder) Categorized by Age Group 6 to 9 Years

| <b>System Organ Class<br/>(Preferred Term,<br/>MedDRA 19.1)</b> | <b>Lubiprostone<br/>12 mcg BID<br/>(n=39),<br/>n (%)</b> | <b>Lubiprostone<br/>24 mcg BID<br/>(n=3),<br/>n (%)</b> | <b>Total<br/>(N=42),<br/>N (%)</b> |
|-----------------------------------------------------------------|----------------------------------------------------------|---------------------------------------------------------|------------------------------------|
| <b>Patients with <math>\geq 1</math> TEAE</b>                   | 24 (61.5)                                                | 1 (33.3)                                                | 25 (59.5)                          |
| <b>Gastrointestinal disorders</b>                               | 10 (25.6)                                                | 1 (33.3)                                                | 11 (26.2)                          |
| Nausea                                                          | 4 (10.3)                                                 | 1 (33.3)                                                | 5 (11.9)                           |
| Vomiting                                                        | 3 (7.7)                                                  | 1 (33.3)                                                | 4 (9.5)                            |
| Diarrhea                                                        | 2 (5.1)                                                  | 0 (0.0)                                                 | 2 (4.8)                            |
| <b>General disorders and administration site conditions</b>     | 3 (7.7)                                                  | 0 (0.0)                                                 | 3 (7.1)                            |
| Chest pain                                                      | 2 (5.1)                                                  | 0 (0.0)                                                 | 2 (4.8)                            |
| <b>Infections and infestations</b>                              | 7 (17.9)                                                 | 0 (0.0)                                                 | 7 (16.7)                           |
| Gastroenteritis viral                                           | 2 (5.1)                                                  | 0 (0.0)                                                 | 2 (4.8)                            |
| Pharyngitis streptococcal                                       | 2 (5.1)                                                  | 0 (0.0)                                                 | 2 (4.8)                            |
| Sinusitis                                                       | 2 (5.1)                                                  | 0 (0.0)                                                 | 2 (4.8)                            |
| <b>Investigations</b>                                           | 7 (17.9)                                                 | 0 (0.0)                                                 | 7 (16.7)                           |
| Blood iron decreased                                            | 3 (7.7)                                                  | 0 (0.0)                                                 | 3 (7.1)                            |
| Blood uric acid decreased                                       | 2 (5.1)                                                  | 0 (0.0)                                                 | 2 (4.8)                            |
| <b>Nervous system disorders</b>                                 | 2 (5.1)                                                  | 0 (0.0)                                                 | 2 (4.8)                            |
| Headache                                                        | 2 (5.1)                                                  | 0 (0.0)                                                 | 2 (4.8)                            |
| <b>Respiratory, thoracic, and mediastinal disorders</b>         | 4 (10.3)                                                 | 0 (0.0)                                                 | 4 (9.5)                            |
| Dyspnea                                                         | 2 (5.1)                                                  | 0 (0.0)                                                 | 2 (4.8)                            |

BID = twice daily; GI = gastrointestinal; MedDRA = Medical Dictionary for Regulatory Activities; N = total population; n = subgroup of total population; TEAE = treatment-emergent adverse event.
