# Supplementary material for: Safety of Lubiprostone in Pediatric Patients With Functional Constipation: A Nonrandomized, Open-Label Trial
Source: PubMed Central journal article supplement — J Pediatr Gastroenterol Nutr. 2021 Aug 13;73(5):572–8. doi: 10.1097/MPG.0000000000003280 (PMC8528133; doi:10.1097/mpg.0000000000003280), 2021-08-13
Supplement: jpga-73-572-s013.pdf [file jpga-73-572-s013.pdf]

**Supplemental Table 7.** Commonly Reported TEAEs ( $\geq 5\%$  of Patients in Either Group or  $\geq 3\%$  of Patients With a GI Disorder) Categorized by Age Group 10 to 13 Years

| <b>System Organ Class<br/>(Preferred Term, MedDRA<br/>19.1)</b>     | <b>Lubiprostone<br/>12 mcg BID<br/>(n=16),<br/>n (%)</b> | <b>Lubiprostone<br/>24 mcg BID<br/>(n=14),<br/>n (%)</b> | <b>Total<br/>(N=30),<br/>N (%)</b> |
|---------------------------------------------------------------------|----------------------------------------------------------|----------------------------------------------------------|------------------------------------|
| <b>Patients with <math>\geq 1</math> TEAE</b>                       | 7 (43.8)                                                 | 7 (50.0)                                                 | 14 (46.7)                          |
| <b>Gastrointestinal disorders</b>                                   | 3 (18.8)                                                 | 5 (35.7)                                                 | 8 (26.7)                           |
| Diarrhea                                                            | 3 (18.8)                                                 | 1 (7.1)                                                  | 4 (13.3)                           |
| Abdominal pain                                                      | 0 (0.0)                                                  | 2 (14.3)                                                 | 2 (6.7)                            |
| Vomiting                                                            | 0 (0.0)                                                  | 2 (14.3)                                                 | 2 (6.7)                            |
| Abdominal distension                                                | 1 (6.3)                                                  | 0 (0.0)                                                  | 1 (3.3)                            |
| Abdominal pain upper                                                | 1 (6.3)                                                  | 0 (0.0)                                                  | 1 (3.3)                            |
| Anal fissure                                                        | 0 (0.0)                                                  | 1 (7.1)                                                  | 1 (3.3)                            |
| Aphthous ulcer                                                      | 0 (0.0)                                                  | 1 (7.1)                                                  | 1 (3.3)                            |
| Constipation                                                        | 0 (0.0)                                                  | 1 (7.1)                                                  | 1 (3.3)                            |
| Dyspepsia                                                           | 1 (6.3)                                                  | 0 (0.0)                                                  | 1 (3.3)                            |
| Fecaloma                                                            | 0 (0.0)                                                  | 1 (7.1)                                                  | 1 (3.3)                            |
| Gastroesophageal reflux<br>disease                                  | 0 (0.0)                                                  | 1 (7.1)                                                  | 1 (3.3)                            |
| <b>General disorders and<br/>administration site<br/>conditions</b> | 2 (12.5)                                                 | 0 (0.0)                                                  | 2 (6.7)                            |
| Chest discomfort                                                    | 1 (6.3)                                                  | 0 (0.0)                                                  | 1 (3.3)                            |
| Peripheral swelling                                                 | 1 (6.3)                                                  | 0 (0.0)                                                  | 1 (3.3)                            |
| Pyrexia                                                             | 1 (6.3)                                                  | 0 (0.0)                                                  | 1 (3.3)                            |
| <b>Immune system disorders</b>                                      | 1 (6.3)                                                  | 1 (7.1)                                                  | 2 (6.7)                            |
| Allergy to arthropod bite                                           | 1 (6.3)                                                  | 0 (0.0)                                                  | 1 (3.3)                            |

|                                                         |          |          |          |
|---------------------------------------------------------|----------|----------|----------|
| Anaphylactoid reaction                                  | 0 (0.0)  | 1 (7.1)  | 1 (3.3)  |
| <b>Infections and infestations</b>                      | 2 (12.5) | 2 (14.3) | 4 (13.3) |
| Pharyngitis streptococcal                               | 1 (6.3)  | 1 (7.1)  | 2 (6.7)  |
| Sinusitis                                               | 0 (0.0)  | 1 (7.1)  | 1 (3.3)  |
| Urinary tract infection                                 | 1 (6.3)  | 0 (0.0)  | 1 (3.3)  |
| <b>Injury, poisoning, and procedural complications</b>  | 1 (6.3)  | 0 (0.0)  | 1 (3.3)  |
| Vascular injury                                         | 1 (6.3)  | 0 (0.0)  | 1 (3.3)  |
| <b>Investigations</b>                                   | 2 (12.5) | 4 (28.6) | 6 (20.0) |
| Alanine aminotransferase increased                      | 0 (0.0)  | 1 (7.1)  | 1 (3.3)  |
| Blood cholesterol increased                             | 0 (0.0)  | 1 (7.1)  | 1 (3.3)  |
| Blood iron decreased                                    | 0 (0.0)  | 1 (7.1)  | 1 (3.3)  |
| Blood iron increased                                    | 1 (6.3)  | 0 (0.0)  | 1 (3.3)  |
| Blood thyroid-stimulating hormone increased             | 0 (0.0)  | 1 (7.1)  | 1 (3.3)  |
| Glycosylated hemoglobin increased                       | 0 (0.0)  | 1 (7.1)  | 1 (3.3)  |
| Urine analysis abnormal                                 | 1 (6.3)  | 0 (0.0)  | 1 (3.3)  |
| <b>Metabolism and nutrition disorders</b>               | 0 (0.0)  | 1 (7.1)  | 1 (3.3)  |
| Hypertriglyceridemia                                    | 0 (0.0)  | 1 (7.1)  | 1 (3.3)  |
| Impaired fasting glucose                                | 0 (0.0)  | 1 (7.1)  | 1 (3.3)  |
| Nervous system disorders                                | 2 (12.5) | 1 (7.1)  | 3 (10.0) |
| Headache                                                | 1 (6.3)  | 1 (7.1)  | 2 (6.7)  |
| Syncope                                                 | 1 (6.3)  | 0 (0.0)  | 1 (3.3)  |
| <b>Respiratory, thoracic, and mediastinal disorders</b> | 2 (12.5) | 1 (7.1)  | 3 (10.0) |

|                                               |          |         |          |
|-----------------------------------------------|----------|---------|----------|
| Asthma exercise induced                       | 0 (0.0)  | 1 (7.1) | 1 (3.3)  |
| Epistaxis                                     | 1 (6.3)  | 0 (0.0) | 1 (3.3)  |
| Rhinorrhea                                    | 1 (6.3)  | 0 (0.0) | 1 (3.3)  |
| <b>Skin and subcutaneous tissue disorders</b> | 2 (12.5) | 1 (7.1) | 3 (10.0) |
| Dermatitis contact                            | 1 (6.3)  | 0 (0.0) | 1 (3.3)  |
| Pruritus                                      | 1 (6.3)  | 0 (0.0) | 1 (3.3)  |
| Rash                                          | 0 (0.0)  | 1 (7.1) | 1 (3.3)  |

BID = twice daily; GI = gastrointestinal; MedDRA = Medical Dictionary for Regulatory Activities; N = total population; n = subgroup of total population; TEAE = treatment-emergent adverse event.
